# Supplementary material for: High Relative Abundance of Lactobacillus reuteri and Fructose Intake are Associated with Adiposity and Cardiometabolic Risk Factors in Children from Mexico City
Source: MDPI journal article supplement (doi:10.3390/nu11061207), 2019-05-28
Supplement: s1 [file s1]

Supplemental Fig. 1 A

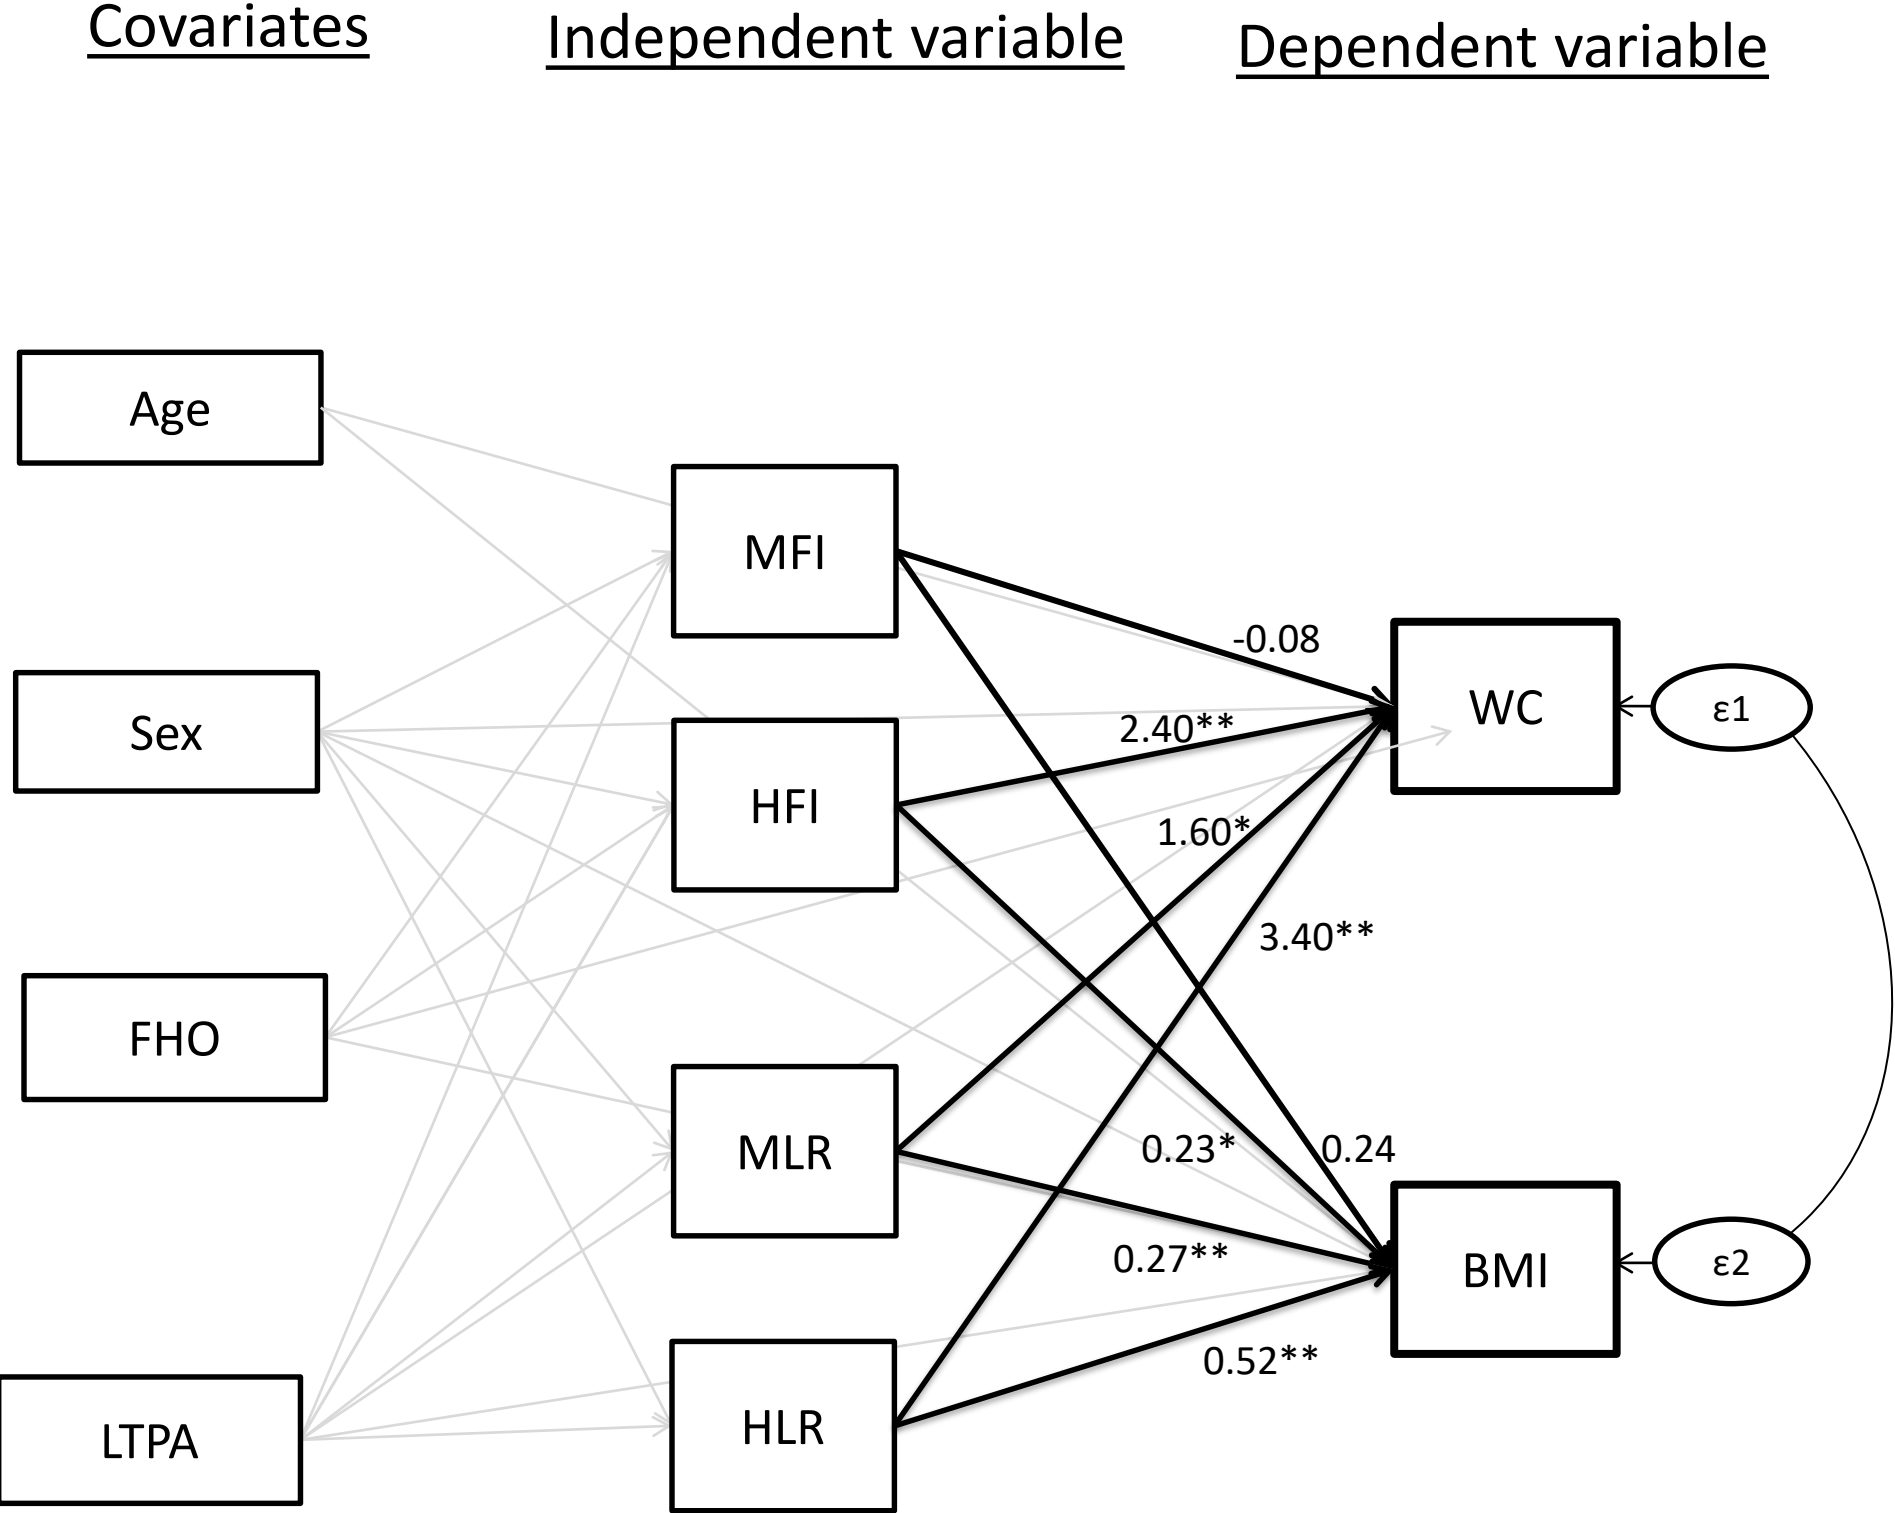

Supplemental Fig. 1 B

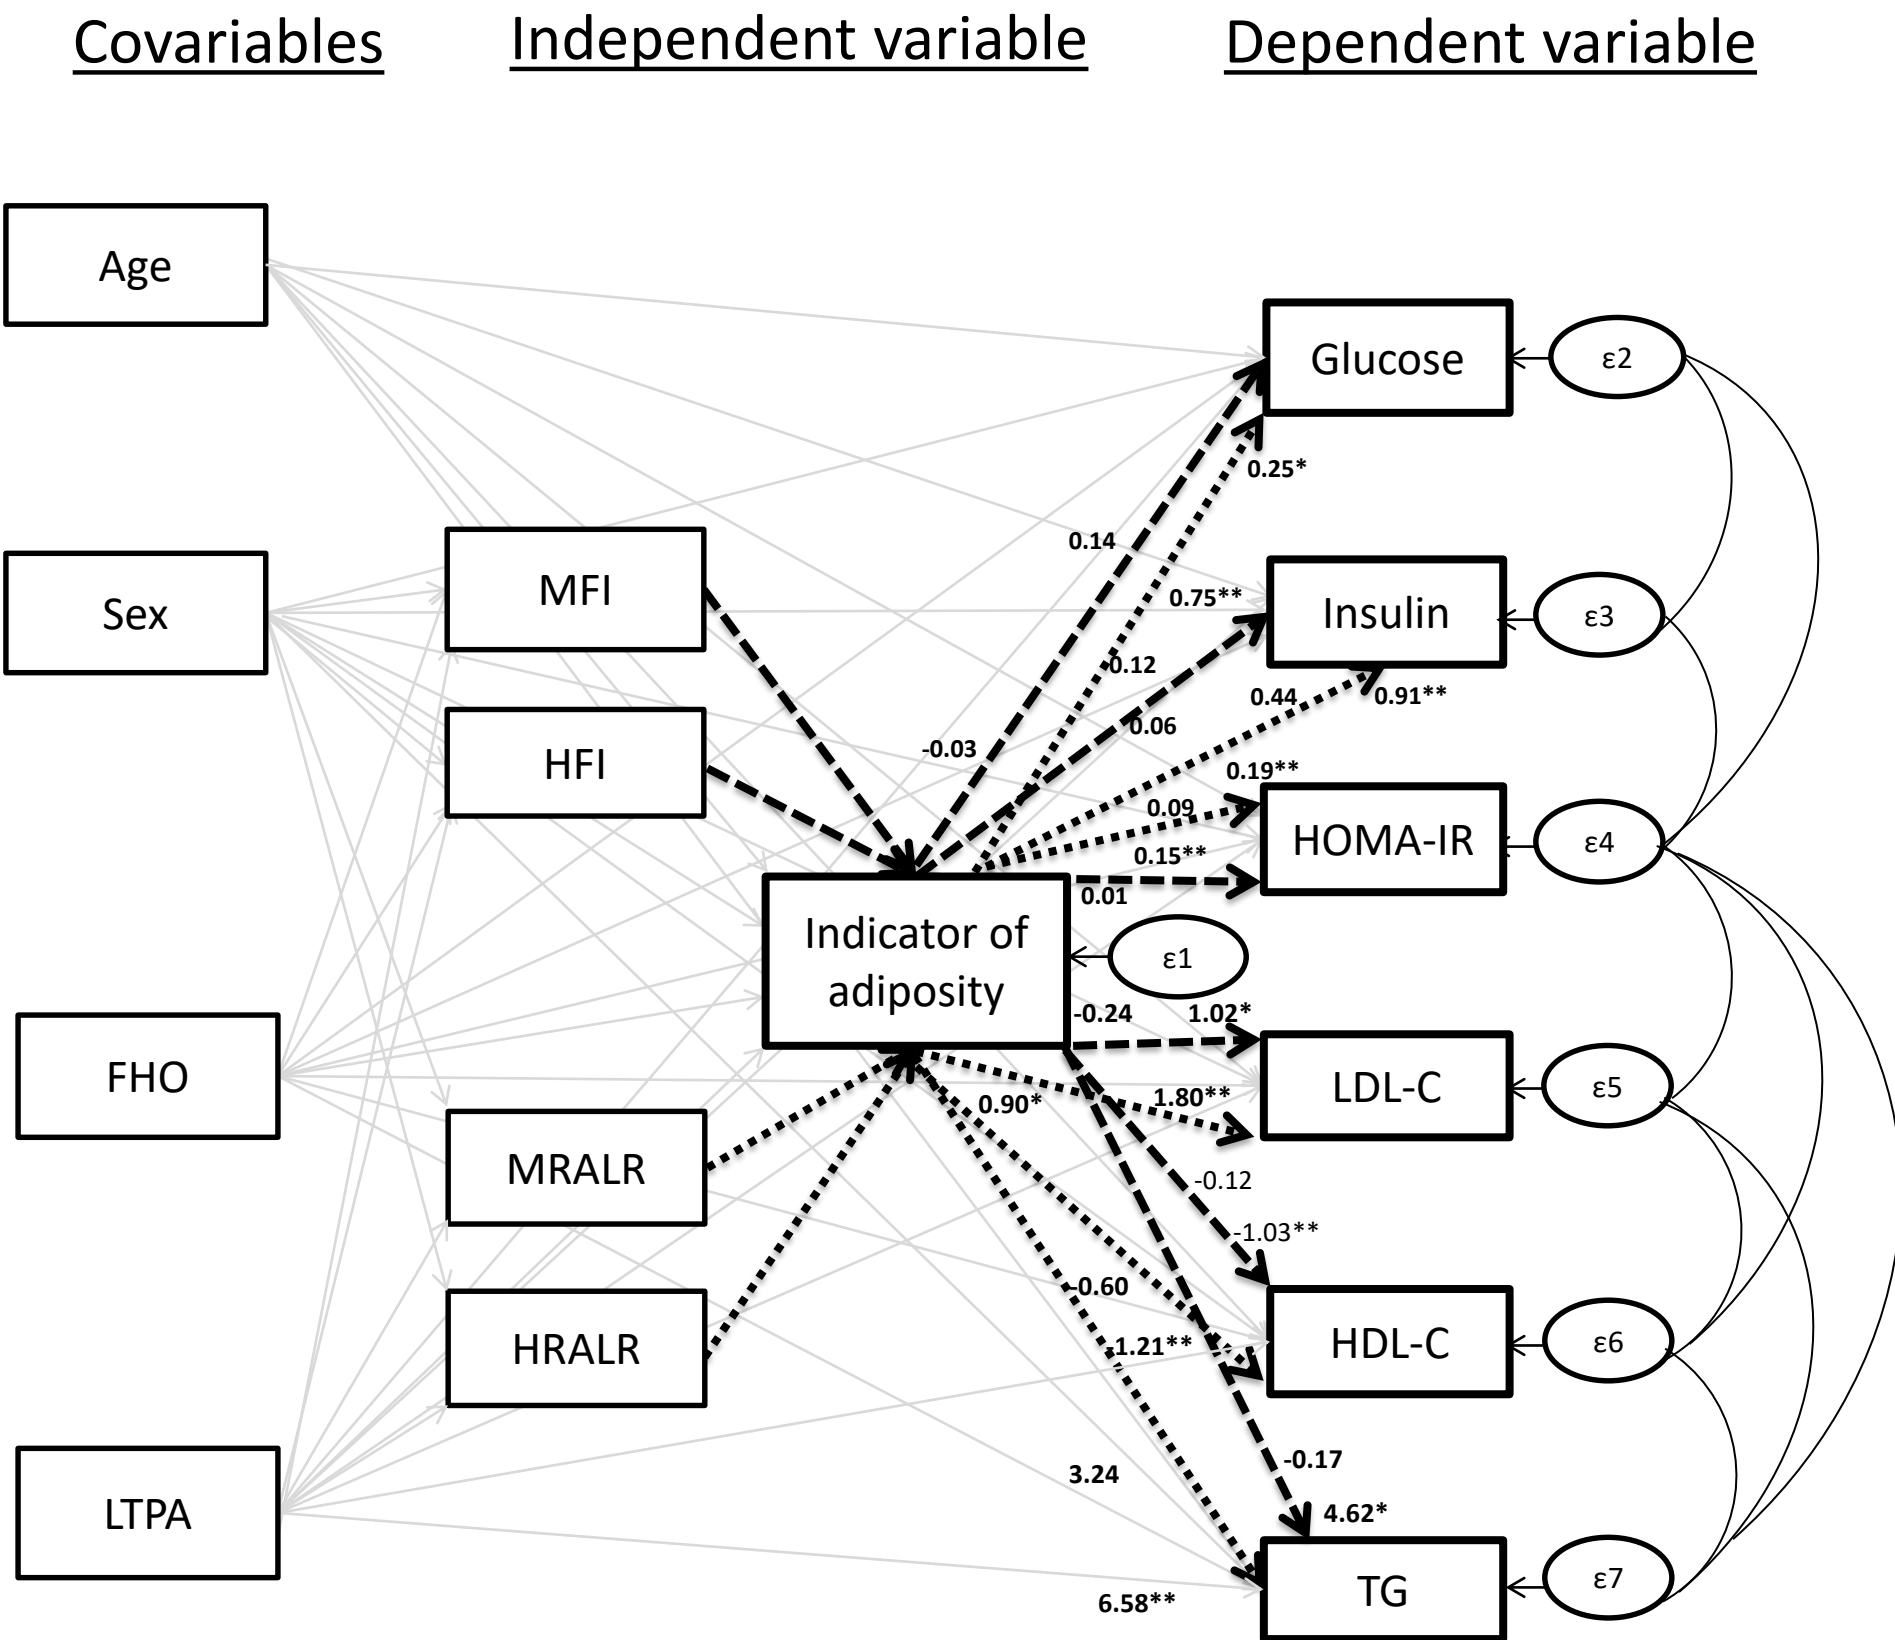

**Path model of direct and indirect association between fructose intake tertiles and relative abundance of *L. reuteri* tertiles with adiposity and cardiometabolic markers in the cohort Mexican children.**

Arrows represent pathways among variables that were statistically significant. The bold arrows and the path coefficients show the significant associations which are relevant to the study objectives (\* $p < 0.05$ ; \*\* $p < 0.01$ ). LFI and LLR were the reference. **A** highlights the statistical significant direct relation between fructose intake tertiles and relative abundance of *L. reuteri* (in tertiles) with adiposity. **B** highlights the indirect relation between fructose intake tertiles and relative abundance of *L. reuteri* (in tertiles) with glucose (mg/dL), insulin ( $\mu\text{U/mL}$ ), HOMA-IR, LDL-C (mg/dl), HDL-C (mg/dL) and triglycerides (mg/dL) which were mediated by adiposity (WC).

FHO, family history of obesity; HDL-C, high density lipoprotein; HFI, High fructose intake; HLR, high relative abundance of *L. reuteri*; HOMA-IR, homeostasis model assessment of insulin resistance; LTPA, Leisure time physical activity; LDL-C, low density lipoprotein; LFI, low fructose intake; LLR, low relative abundance of *L. reuteri*; MFI, medium fructose intake; MLR, medium relative abundance of *L. reuteri*; TG, Triglycerides
